# Supplementary material
Source: bioRxiv or medRxiv preprint supplement (https://medrxiv.org/highwire/filestream/83428/field_highwire_adjunct_files/0/2020.05.26.20113902-1.pdf)

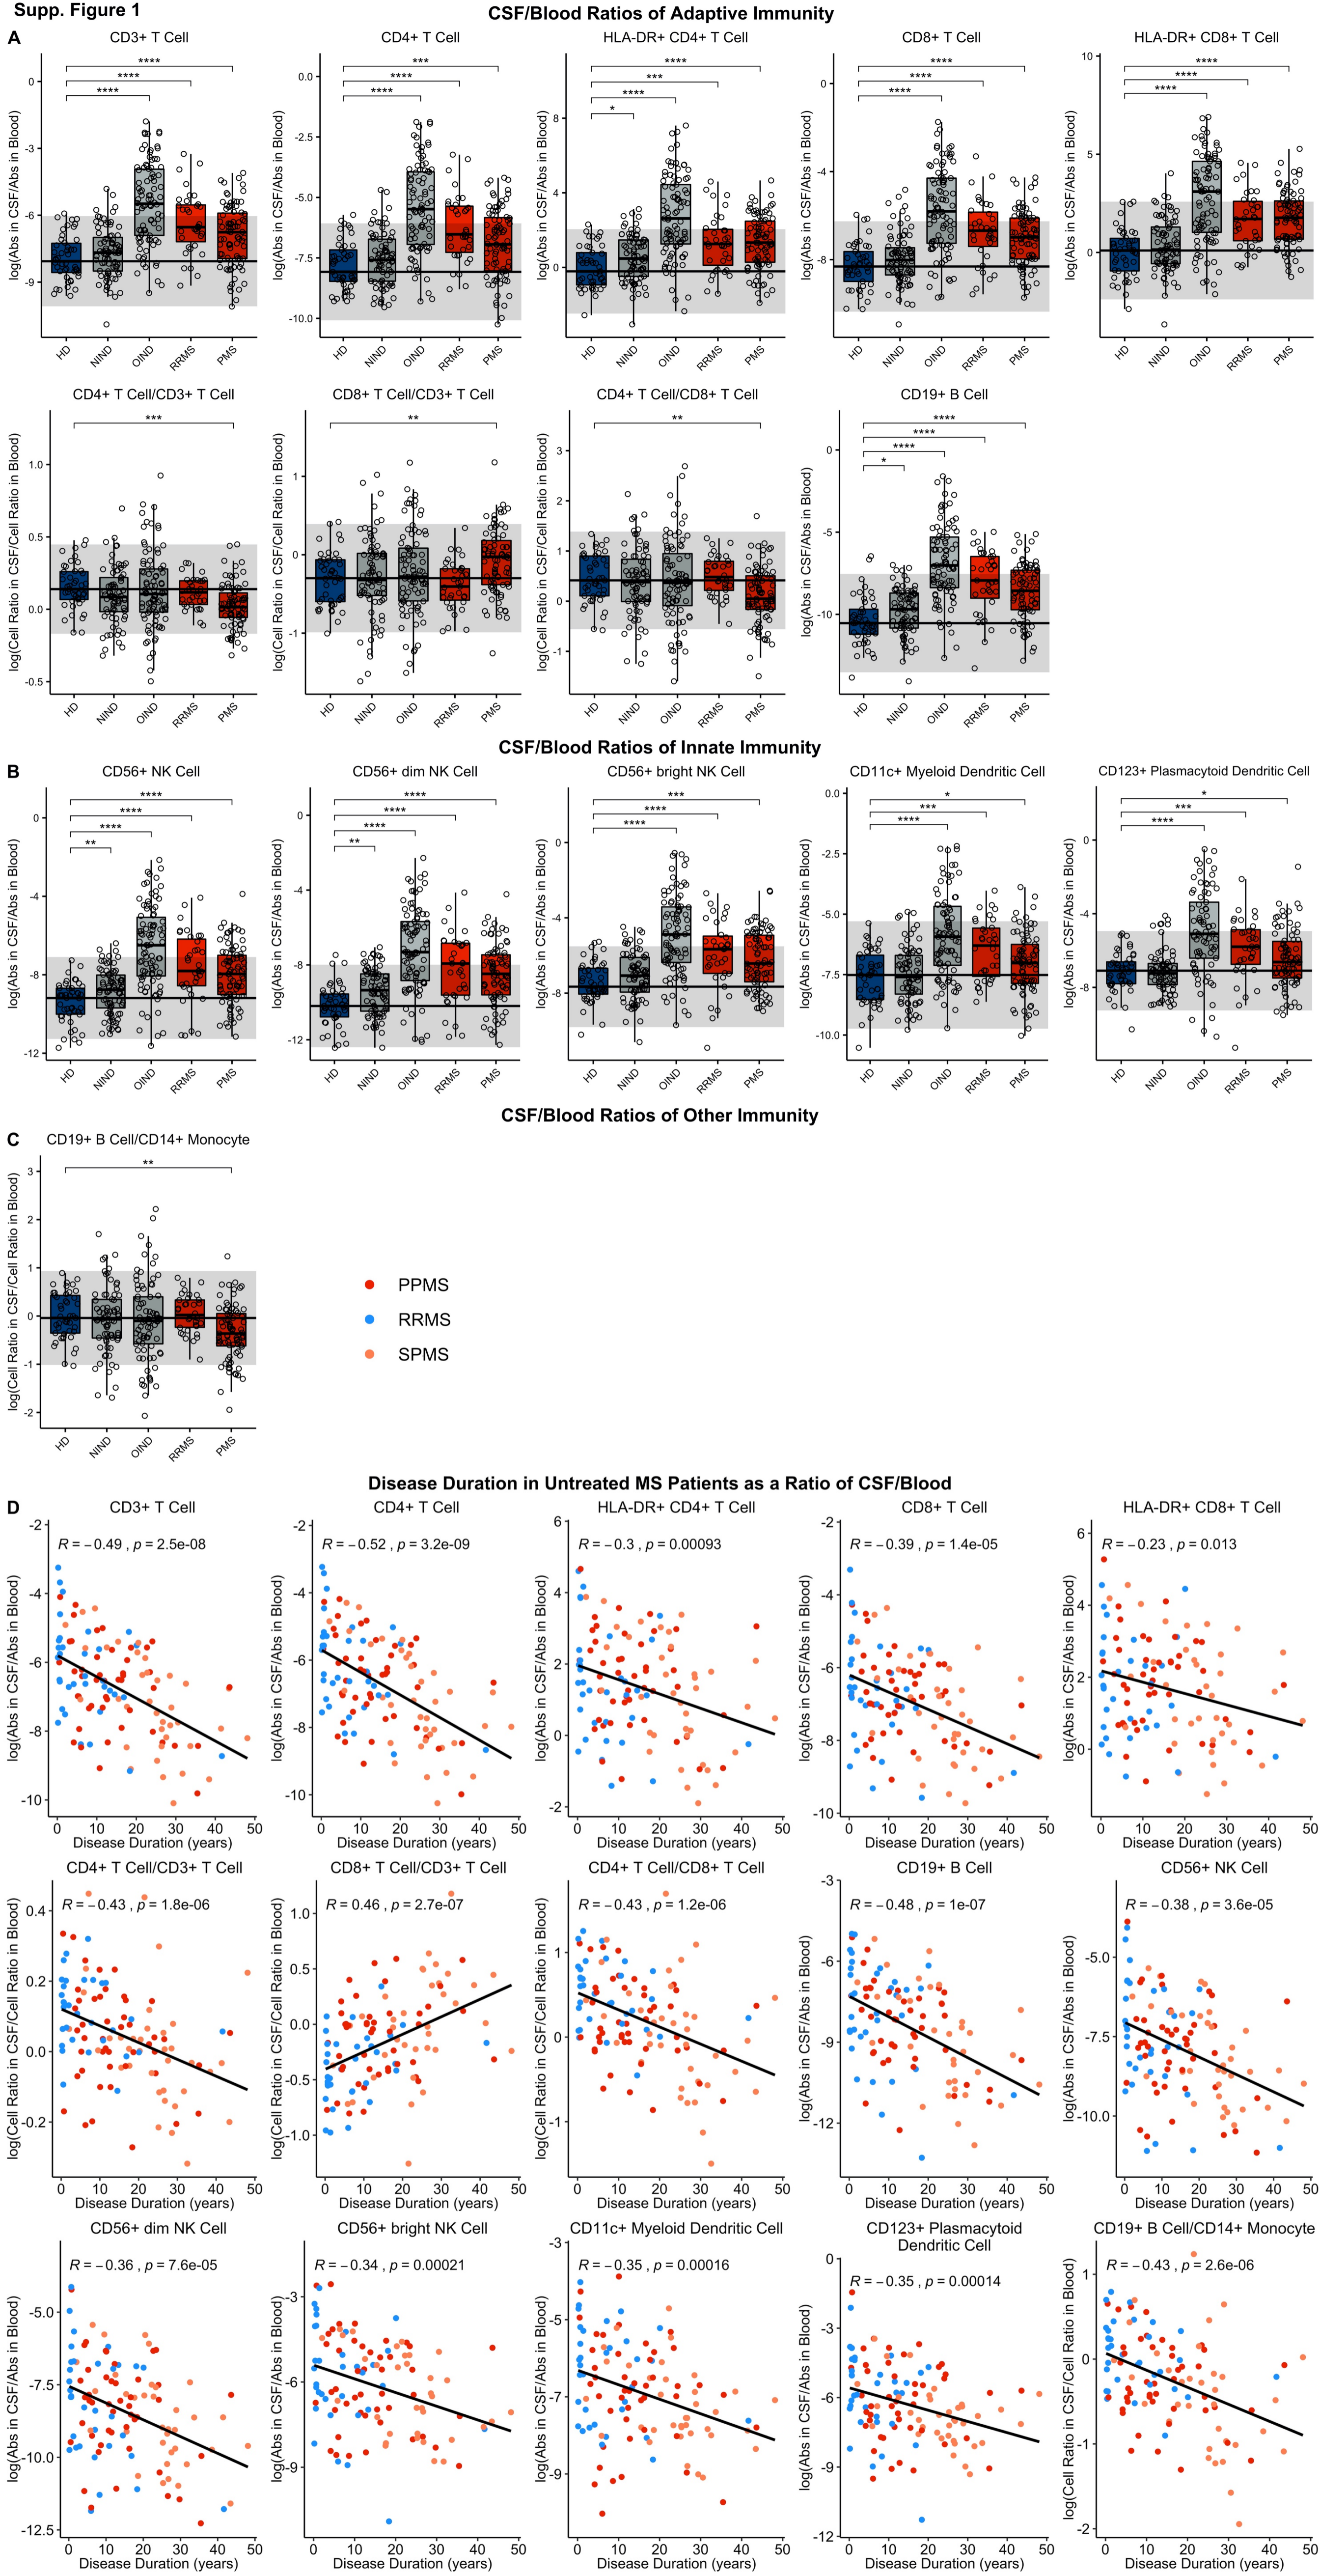

Supplement: Supplementary file [file 2020.05.26.20113902-1.pdf]
